# Supplementary material
Source: PubMed Central journal article supplement (PMC9295893)
Supplement: NIHMS1819708-supplement-Supplementary_Appendix.pdf [file NIHMS1819708-supplement-Supplementary_Appendix.pdf]

**Why is the Electronic Health Record So Challenging  
for Research and Clinical Care?  
Appendix: List of Contributors**

| <b>Author</b>                    | <b>Position</b>                                                                                                              | <b>Expertise</b>                                                                                                                                                                                                                  | <b>Years of experience</b> | <b>Section(s)</b> |
|----------------------------------|------------------------------------------------------------------------------------------------------------------------------|-----------------------------------------------------------------------------------------------------------------------------------------------------------------------------------------------------------------------------------|----------------------------|-------------------|
| James Beinlich                   | Chief Data Information Officer, Penn Medicine                                                                                | <ul style="list-style-type: none"> <li>• Health information systems design and implementation</li> <li>• Data governance</li> <li>• Data integration</li> <li>• Clinical informatics</li> </ul>                                   | 18                         | 7.2               |
| Mary Regina Boland, PhD          | Assistant Professor of Informatics, University of Pennsylvania Perelman School of Medicine                                   | <ul style="list-style-type: none"> <li>• Biomedical Informatics</li> <li>• Data Mining, Electronic Health Records</li> <li>• Translational Informatics/Research</li> <li>• Precision Medicine</li> </ul>                          | 13                         | 5.2               |
| Kathryn Bowles, PhD, FAAN, FACMI | Professor of Nursing and van Ameringen Chair in Nursing Excellence, University of Pennsylvania School of Nursing             | <ul style="list-style-type: none"> <li>• Building and testing clinical decision support using electronic health record data</li> <li>• Expert knowledge elicitation</li> </ul>                                                    | 20                         | 8.2               |
| Yong Chen, PhD                   | Associate Professor of Biostatistics, University of Pennsylvania Perelman School of Medicine                                 | <ul style="list-style-type: none"> <li>• Analysis of real-world data</li> <li>• Data privacy and confidentiality</li> <li>• Data integration and evidence synthesis</li> </ul>                                                    | 16                         | 6.2               |
| Tessa Cook, MD, PhD, CIIP, FSIMM | Assistant Professor of Radiology, University of Pennsylvania Perelman School of Medicine                                     | <ul style="list-style-type: none"> <li>• Imaging Informatics</li> <li>• Artificial Intelligence</li> <li>• Natural Language Processing</li> <li>• Patient- and Family-Centered Care</li> <li>• Practice Transformation</li> </ul> | 20                         | 6.3, 9.1          |
| George Demiris, PhD, FACMI       | Penn Integrates Knowledge University Professor, University of Pennsylvania School of Nursing and Perelman School of Medicine | <ul style="list-style-type: none"> <li>• Personal health informatics</li> <li>• Human factors</li> <li>• Participatory design</li> <li>• Aging and technology</li> </ul>                                                          | 25                         | 3.1               |
| Michael Draugelis, BS            | Chief Data Scientist, Penn Medicine                                                                                          | <ul style="list-style-type: none"> <li>• Machine Learning</li> <li>• Decision Science</li> <li>• Data Engineering</li> </ul>                                                                                                      | 22                         | 8.2, 9.5          |

|                                  |                                                                                                                                                  |                                                                                                                                                                                                                                       |    |          |
|----------------------------------|--------------------------------------------------------------------------------------------------------------------------------------------------|---------------------------------------------------------------------------------------------------------------------------------------------------------------------------------------------------------------------------------------|----|----------|
| Laura Fluharty, MPH              | Senior Director, Clinical Research Operations and Research Entity Privacy Officer for Penn Medicine                                              | <ul style="list-style-type: none"> <li>• HIPAA and Research</li> <li>• Clinical Trial Operations</li> <li>• IT platforms to support clinical research operations</li> </ul>                                                           | 14 | 6.3      |
| Peter Gabriel, MD                | Associate Professor of Clinical Radiation Oncology and Chief Oncology Informatics Officer University of Pennsylvania Perelman School of Medicine | <ul style="list-style-type: none"> <li>• Oncology Informatics</li> <li>• Clinical Informatics</li> <li>• Electronic Phenotyping</li> <li>• Data Warehouse Development</li> <li>• Ontologies and Standardized Terminologies</li> </ul> | 15 | 5.1, 7.2 |
| Robert Grundmeier, MD            | Director of Clinical Informatics, Children's Hospital of Philadelphia                                                                            | <ul style="list-style-type: none"> <li>• Clinical research informatics</li> </ul>                                                                                                                                                     | 20 | 5.4      |
| William Hanson, MD               | Chief Medical Officer, Penn Medicine                                                                                                             | <ul style="list-style-type: none"> <li>• Clinical informatics</li> <li>• Data governance</li> <li>• Data science</li> <li>• Electronic health records</li> </ul>                                                                      | 11 | 6.1      |
| Daniel S. Herman, MD, PhD        | Assistant Professor of Pathology & Laboratory Medicine, University of Pennsylvania Perelman School of Medicine                                   | <ul style="list-style-type: none"> <li>• Laboratory medicine</li> <li>• Biomedical informatics</li> <li>• Electronic health records</li> <li>• Machine learning</li> <li>• Clinical standardization and Harmonization</li> </ul>      | 17 | 4.2      |
| Blanca E. Himes, PhD, ATSF       | Associate Professor of Informatics, University of Pennsylvania Perelman School of Medicine                                                       | <ul style="list-style-type: none"> <li>• Secondary use of EHR data</li> <li>• Genomics</li> <li>• Data science</li> </ul>                                                                                                             | 14 | 9.2, 9.4 |
| John H. Holmes, PhD, FACE, FACMI | Professor of Medical Informatics in Epidemiology, University of Pennsylvania Perelman School of Medicine                                         | <ul style="list-style-type: none"> <li>• Artificial intelligence</li> <li>• Machine learning</li> <li>• Clinical research informatics</li> <li>• Data integration</li> <li>• Human factors</li> <li>• Epidemiology</li> </ul>         | 40 | 1, 2, 10 |
| Rebecca A. Hubbard, PhD          | Professor of Biostatistics, University of Pennsylvania,                                                                                          | <ul style="list-style-type: none"> <li>• Biostatistics</li> <li>• Bayesian methods</li> <li>• Aging and dementia</li> <li>• Cancer epidemiology</li> </ul>                                                                            | 15 | 9.2      |

|                                               |                                                                                                              |                                                                                                                                                                                                                                                      |    |          |
|-----------------------------------------------|--------------------------------------------------------------------------------------------------------------|------------------------------------------------------------------------------------------------------------------------------------------------------------------------------------------------------------------------------------------------------|----|----------|
|                                               | Perelman School of Medicine                                                                                  | <ul style="list-style-type: none"> <li>• Health services research</li> </ul>                                                                                                                                                                         |    |          |
| Charles Kahn, MD, MS, PhD, FACR, FACMI, FSIIM | Professor and Vice Chair of Radiology, University of Pennsylvania Perelman School of Medicine                | <ul style="list-style-type: none"> <li>• Artificial intelligence</li> <li>• Clinical decision support</li> <li>• Ontologies</li> <li>• Knowledge representation</li> <li>• Imaging informatics</li> <li>• Diagnostic radiology</li> </ul>            | 32 | 5.3      |
| Dokyoon Kim, PhD                              | Assistant Professor of Informatics, University of Pennsylvania Perelman School of Medicine                   | <ul style="list-style-type: none"> <li>• Biomedical Informatics</li> <li>• Data integration</li> <li>• Machine learning</li> <li>• Electronic Health Records</li> <li>• Translational Informatics</li> </ul>                                         | 15 | 7.1      |
| Ross Koppel, PhD, FACMI                       | University of Pennsylvania Perelman School of Medicine and University at Buffalo, Jacobs' School of Medicine | <ul style="list-style-type: none"> <li>• Usability</li> <li>• Human-computer interaction</li> <li>• Workflow analysis</li> <li>• Vendor-healthcare facility interactions</li> </ul>                                                                  | 42 | 3.2      |
| Qi Long, PhD                                  | Professor of Biostatistics, University of Pennsylvania Perelman School of Medicine                           | <ul style="list-style-type: none"> <li>• Statistical and machine learning methods</li> <li>• EHR, -omics and mHealth data</li> <li>• Missing data</li> <li>• Causal inference</li> <li>• Privacy and fairness</li> <li>• Bayesian methods</li> </ul> | 20 | 4.1, 9.3 |
| Nebo Mirkovic, PhD                            | Associate Director for Research Analytics, Penn Medicine                                                     | <ul style="list-style-type: none"> <li>• Data warehousing</li> <li>• Data analysis</li> <li>• Clinical information systems</li> </ul>                                                                                                                | 10 | 6.3      |
| Jason H. Moore, PhD, FACMI                    | Edward Rose Professor of Informatics, University of Pennsylvania Perelman School of Medicine                 | <ul style="list-style-type: none"> <li>• Artificial intelligence</li> <li>• Machine learning</li> <li>• Translational bioinformatics</li> </ul>                                                                                                      | 25 | 10       |
| Jeffrey Morris, PhD                           | Professor of Biostatistics, University of Pennsylvania Perelman School of Medicine                           | <ul style="list-style-type: none"> <li>• Biostatistics, Genomics</li> <li>• Big Data</li> </ul>                                                                                                                                                      | 21 | 7.1      |
| Daniele Mowery, PhD                           | Chief Research Information Officer,                                                                          | <ul style="list-style-type: none"> <li>• Clinical/Translational Research Informatics</li> </ul>                                                                                                                                                      | 15 | 6.3      |

|                             |                                                                                            |                                                                                                                                                                          |    |          |
|-----------------------------|--------------------------------------------------------------------------------------------|--------------------------------------------------------------------------------------------------------------------------------------------------------------------------|----|----------|
|                             | Assistant Professor of Informatics, University of Pennsylvania Perelman School of Medicine | <ul style="list-style-type: none"> <li>• Electronic Health Records</li> <li>• Machine Learning</li> <li>• Natural Language Processing</li> </ul>                         |    |          |
| Marylyn Ritchie, PhD, FACMI | Professor of Genetics, University of Pennsylvania Perelman School of Medicine              | <ul style="list-style-type: none"> <li>• Translational bioinformatics</li> <li>• Statistical genetics</li> <li>• Machine learning</li> <li>• Data integration</li> </ul> | 21 | 8.1, 9.3 |
| Ryan Urbanowicz, Meng, PhD  | Assistant Professor of Informatics, University of Pennsylvania Perelman School of Medicine | <ul style="list-style-type: none"> <li>• Machine learning</li> <li>• Biomedical informatics</li> <li>• Data science</li> <li>• Genetics</li> </ul>                       | 9  | 4.1, 9.5 |
